# Supplementary material
Source: Springer Nature journal article supplement (https://www.springermedizin.de/resource/supplementary/12885_2006_655_MOESM2_ESM.pdf/9470650)

kDa

200

124

80

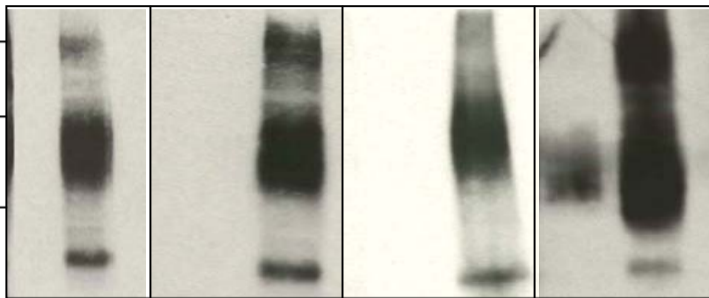

T N

**A**

T N

**B**

T N

**C**

T N

**D**

Supplement: MOESM2 [file 9470650]
